# Supplementary material
Source: PubMed Central journal article supplement (PMC11029146)
Supplement: 262_2015_1670_MOESM1_ESM.pdf [file 262_2015_1670_MOESM1_ESM.pdf]

**Supplementary Table 1. Characteristics of the studied patient samples**

| Patient number | Rai Stage | Sex | Age (y) | Hb (g/dL) | Leukocyte count ( $10^3/\text{mm}^3$ ) | Platelet count ( $10^3/\text{mm}^3$ ) |
|----------------|-----------|-----|---------|-----------|----------------------------------------|---------------------------------------|
| 1              | I         | F   | 80      | 11.9      | 17.7                                   | 231                                   |
| 2              | 0         | M   | 55      | 14.2      | 15.5                                   | 155                                   |
| 3              | III       | F   | 81      | 11.8      | 97.2                                   | 93                                    |
| 4              | IV        | M   | 40      | 10.3      | 19.22                                  | 3                                     |
| 5              | IV        | M   | 81      | 10.1      | 10.6                                   | 2                                     |
| 6              | O         | F   | 89      | 13.7      | 11.6                                   | 190                                   |
| 7              | I         | F   | 76      | na        | na                                     | na                                    |
| 8              | III       | M   | 58      | 11.3      | 12.4                                   | 122                                   |
| 9              | IV        | F   | 84      | 10.9      | 23.3                                   | 24                                    |
| 10             | IV        | M   | 73      | 12.8      | 19.9                                   | 145                                   |
| 11             | IV        | M   | 59      | na        | na                                     | na                                    |
| 12             | IV        | M   | 60      | 12.0      | 7.0                                    | 75                                    |
| 13             | IV        | M   | 53      | 14.2      | 6.9                                    | 70                                    |
| 14             | IV        | M   | 74      | 12.3      | 74.2                                   | 176                                   |
| 15             | 0         | M   | 50      | 15.9      | 70.5                                   | 150                                   |
| 16             | IV        | M   | 60      | 12.3      | 6.2                                    | 83                                    |
| 17             | I         | M   | 60      | 15.3      | 57.7                                   | 179                                   |
| 18             | I         | M   | 48      | 16.3      | 14.1                                   | 136                                   |
| 19             | IV        | F   | 79      | 12.2      | 101.7                                  | 93                                    |
| 20             | 0         | F   | 73      | 13.9      | 5.5                                    | 226                                   |
| 21             | I         | F   | 57      | 16        | 17.45                                  | 161                                   |
| 22             | 0         | F   | 72      | 15.2      | 11.84                                  | 297                                   |
| 23             | 0         | M   | 55      | 14.2      | 15.13                                  | 155                                   |

The table presents the clinical features of the studied patients. F, female; M, male; y, years; Hb, hemoglobin; na, not available.

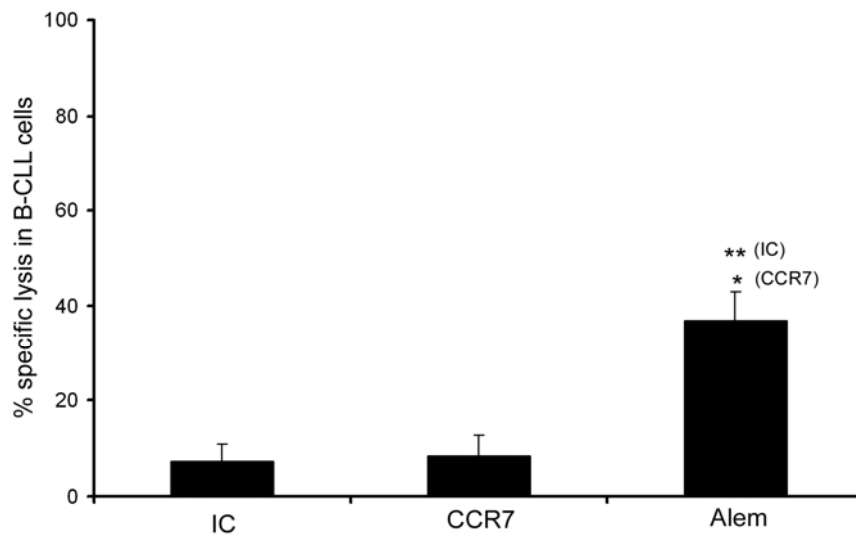

**Supplementary Figure 1. Mouse anti-human CCR7 antibodies do not mediate antibody-dependent cell-mediated cytotoxicity (ADCC)**

CLL cells were incubated with media alone or in the presence of an isotype control (IC), anti-CD52 (alemtuzumab, Alem) or anti-CCR7 antibodies. Isolated and IL-2-stimulated NK cells from healthy donors were used as effector cells at a effector to target (E:T) ratio of 6:1. After 4h, the percentage of CLL cells killed by ADCC was determined by FCM as described in the Material and Methods section. Data were normalized to the media control. Columns represent the mean of three independent experiments; bars represent mean standard error. \*,  $p < 0.05$ ; \*\*,  $p < 0.01$ .

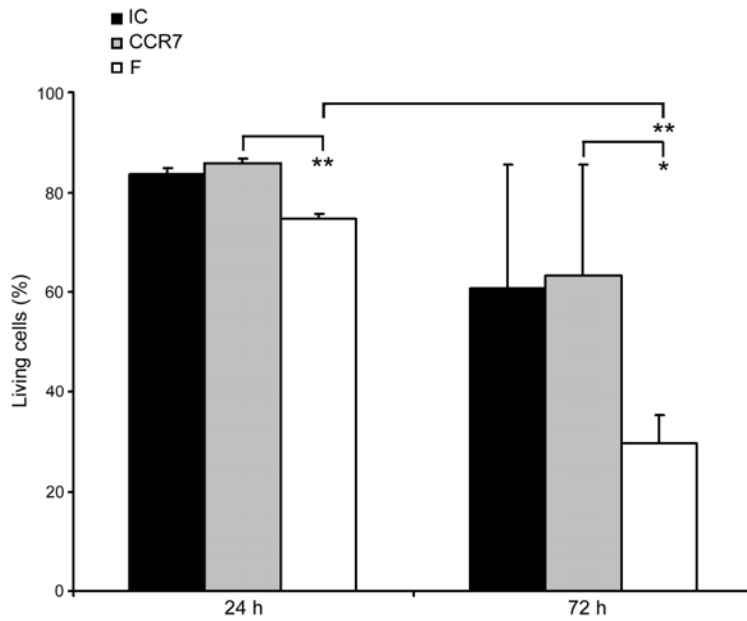

**Supplementary Figure 2. Mouse anti-human CCR7 antibodies do not mediate direct pro-apoptotic effects in CLL cells**

CLL cells were incubated in the presence of either an isotype control antibody (IC), anti-CCR7 antibody (CCR7) or fludarabine as positive control (F). Cell viability was determined after 24 and 72 hours by double staining with FITC-labelled Annexin-V (AV) and 7-AAD. Flow cytometry analysis and quantification of living cells (7-AAD<sup>-</sup> AV<sup>-</sup> cells) was performed. The percentage of viable living cells is shown. Results are expressed as mean of three different experiments  $\pm$  mean standard error. \*,  $p < 0.05$ ; \*\*,  $p < 0.01$ .
